# Supplementary figures and images for: A best practice fall prevention exercise program to improve balance, strength / power, and psychosocial health in older adults: study protocol for a randomized controlled trial
Source: Springer Nature journal article supplement (doi:10.1186/1471-2318-13-105), 2013-10-09

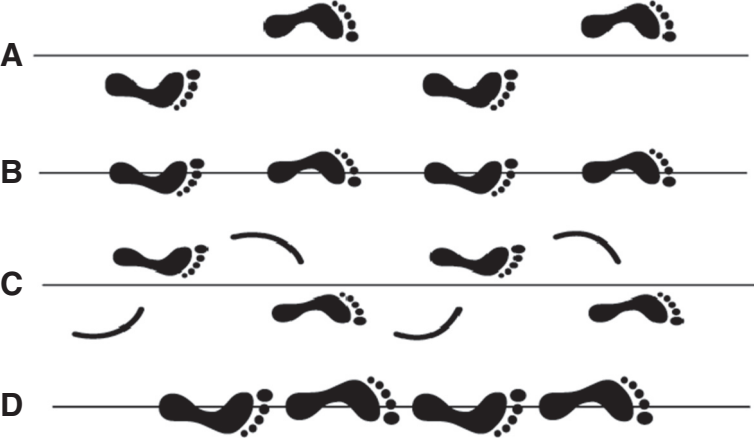

Supplement: 12877_2013_913_MOESM3_ESM.pdf [file 12877_2013_913_MOESM3_ESM.pdf]
